# Supplementary material for: Strategies to Increase Uptake of Parent Education Programs in Preschool and School Settings to Improve Child Outcomes: A Delphi Study
Source: MDPI journal article supplement (doi:10.3390/ijerph18073524), 2021-03-29
Supplement: s1 [file s1]

## Supplementary Table S1: Items endorsed, rejected or re-rated in each survey round

Article: *Strategies to Increase Uptake of Parent Education Programs in Preschool and School Settings to Improve Child Outcomes: A Delphi Study*

### Round 1 Survey

| Endorsed (≥80% expert consensus)                                                                                                                                                                                                                                                                                                                                                                                                                                                                                                                                                                                                                                                                                                                                                                                     | To be re-rated (70-79.9% expert consensus)                                                                                                                                                                                     | Rejected (<70% expert consensus)                                                                                                                                                                                                                                                                                                                                                                                                                                                                                                                                                                                                                                                                                                                                                                                                                                                                                                                                                                            |
|----------------------------------------------------------------------------------------------------------------------------------------------------------------------------------------------------------------------------------------------------------------------------------------------------------------------------------------------------------------------------------------------------------------------------------------------------------------------------------------------------------------------------------------------------------------------------------------------------------------------------------------------------------------------------------------------------------------------------------------------------------------------------------------------------------------------|--------------------------------------------------------------------------------------------------------------------------------------------------------------------------------------------------------------------------------|-------------------------------------------------------------------------------------------------------------------------------------------------------------------------------------------------------------------------------------------------------------------------------------------------------------------------------------------------------------------------------------------------------------------------------------------------------------------------------------------------------------------------------------------------------------------------------------------------------------------------------------------------------------------------------------------------------------------------------------------------------------------------------------------------------------------------------------------------------------------------------------------------------------------------------------------------------------------------------------------------------------|
| <b>Parent education programs selection</b><br><br><i>Schools should...</i> <ol style="list-style-type: none"> <li>1. select programs that are most relevant to the school's parent population.</li> <li>2. include parent committees in the process of selecting programs.</li> <li>3. select programs that uses a whole school approach.</li> <li>4. select programs that are culturally relevant to the school's population.</li> <li>5. select programs that can be tailored to parents' individual needs.</li> <li>6. select programs that treat parents as equal partners.</li> <li>7. select programs that include strategies with a research evidence base for being effective.</li> <li>8. select universal prevention programs with basic strategies for creating positive family communication.</li> </ol> | <i>Schools should...</i> <ol style="list-style-type: none"> <li>1. select programs based on their ability to target risk and protective factors for the development of child and adolescent mental health problems.</li> </ol> | <i>Schools should...</i> <ol style="list-style-type: none"> <li>1. select programs that target modifiable risk factors (risk factors that can be addressed through actions).</li> <li>2. select programs that include components for children.*</li> <li>3. schools should include children in the recruitment process.</li> <li>4. select programs that are not run by organisations associated with child protective services.</li> <li>5. select online or technology assisted programs.</li> <li>6. select prevention programs with basic information that is beneficial to all parents.</li> <li>7. select universal prevention programs with basic strategies for creating reasonable expectations for their child's behaviour.</li> <li>8. select universal prevention programs with basic strategies for creating consistent expectations for their child's behaviour.</li> <li>9. select universal prevention programs with basic strategies for creating regular family communication.</li> </ol> |

| Endorsed (≥80% expert consensus)                                                                                                                                                                                                                                                                                                                                                                                                          | To be re-rated (70-79.9% expert consensus) | Rejected (<70% expert consensus)                                                                                                                                                                                                                                                                                                                                                                                                                                                                                                              |
|-------------------------------------------------------------------------------------------------------------------------------------------------------------------------------------------------------------------------------------------------------------------------------------------------------------------------------------------------------------------------------------------------------------------------------------------|--------------------------------------------|-----------------------------------------------------------------------------------------------------------------------------------------------------------------------------------------------------------------------------------------------------------------------------------------------------------------------------------------------------------------------------------------------------------------------------------------------------------------------------------------------------------------------------------------------|
|                                                                                                                                                                                                                                                                                                                                                                                                                                           |                                            | 10. select universal prevention programs with basic strategies for engaging with children and adolescents.<br>11. provide programs that are translated to languages other than english.<br><br><i>*re-written as new statement for rating in Round 2.</i>                                                                                                                                                                                                                                                                                     |
| <b>Program development</b><br><br>Nil.                                                                                                                                                                                                                                                                                                                                                                                                    | Nil.                                       | <b><i>program developers should...</i></b> <ol style="list-style-type: none"> <li>1. make efforts to reduce potential stigma in their program design.</li> <li>2. seek the input of educators when developing their programs.</li> <li>3. seek the input of school staff when developing their programs.</li> </ol>                                                                                                                                                                                                                           |
| <b>Increasing the accessibility of parent education programs</b><br><br><b><i>Program developers should provide parents with choice on how the program is delivered, including...</i></b> <ol style="list-style-type: none"> <li>1. face-to-face options</li> <li>2. flexible timing.</li> </ol> <b><i>The programs should provide practical support, including...</i></b> <ol style="list-style-type: none"> <li>1. catering.</li> </ol> | Nil.                                       | <b><i>Program developers should provide parents with choice on how the program is delivered, including...</i></b> <ol style="list-style-type: none"> <li>1. online options.</li> <li>2. flexible locations.</li> <li>3. transportation assistance.</li> </ol> <b><i>The programs should provide practical support, including...</i></b> <ol style="list-style-type: none"> <li>1. child minding.</li> <li>2. be delivered at school if the program is face-to-face.*</li> </ol><br><i>*re-written as new statement for rating in Round 2.</i> |

| Endorsed (≥80% expert consensus)                                                                                                                                                                                                                                                                                                                                                                                                                                                                                                                                                                                                                                                                                                                                                                                                                                                                                                                                                                                                                                                                                                                                                                                                                                                                                                                                                                                                                                                 | To be re-rated (70-79.9% expert consensus) | Rejected (<70% expert consensus)                                                                                                                                                                                                                                                                                                                                                 |
|----------------------------------------------------------------------------------------------------------------------------------------------------------------------------------------------------------------------------------------------------------------------------------------------------------------------------------------------------------------------------------------------------------------------------------------------------------------------------------------------------------------------------------------------------------------------------------------------------------------------------------------------------------------------------------------------------------------------------------------------------------------------------------------------------------------------------------------------------------------------------------------------------------------------------------------------------------------------------------------------------------------------------------------------------------------------------------------------------------------------------------------------------------------------------------------------------------------------------------------------------------------------------------------------------------------------------------------------------------------------------------------------------------------------------------------------------------------------------------|--------------------------------------------|----------------------------------------------------------------------------------------------------------------------------------------------------------------------------------------------------------------------------------------------------------------------------------------------------------------------------------------------------------------------------------|
| <p><b>Parent education program promotion</b></p> <p><i>Schools should...</i></p> <ol style="list-style-type: none"> <li>1. promote programs through universal communication strategies to all parents.</li> <li>2. promote programs through targeted communication with the parents whom staff believe could benefit most from a program.</li> <li>3. include parent committees in the promotion of programs that the school is involved in.</li> <li>4. create a leadership role so that a member of staff takes responsibility for informing other teachers.</li> <li>5. use regular social events to promote programs.</li> <li>6. use online and e-mediated forums to promote programs.</li> </ol> <p><i>School staff should...</i></p> <ol style="list-style-type: none"> <li>1. ensure language used when discussing programs with parents is suited to the target demographic.</li> <li>2. emphasise potential benefits for the child.</li> <li>3. ensure that their tone is positive when approaching parents.</li> </ol> <p><i>Program developers...</i></p> <ol style="list-style-type: none"> <li>1. seek the input of school staff for strategies to promote their programs.</li> <li>2. create promotional materials that use positive language.</li> <li>3. create promotional materials that clearly advertise the practical assistance provided by organisers.</li> <li>4. create promotional materials that provide clear details on how to sign up.</li> </ol> | <p>Nil.</p>                                | <p><i>Schools should...</i></p> <ol style="list-style-type: none"> <li>1. invite parents to initial trials of programs.</li> </ol> <p><i>Program developers should...</i></p> <ol style="list-style-type: none"> <li>1. provide financial incentives for participating.</li> <li>2. create promotional materials that clearly advertise incentives for participating.</li> </ol> |

| Endorsed (≥80% expert consensus)                                                                                                                                                                                                                                                                                                                                                                                                                                                                                                                                                                                                                                                                                                                                                                                                                                                                                                                                                                         | To be re-rated (70-79.9% expert consensus) | Rejected (<70% expert consensus) |
|----------------------------------------------------------------------------------------------------------------------------------------------------------------------------------------------------------------------------------------------------------------------------------------------------------------------------------------------------------------------------------------------------------------------------------------------------------------------------------------------------------------------------------------------------------------------------------------------------------------------------------------------------------------------------------------------------------------------------------------------------------------------------------------------------------------------------------------------------------------------------------------------------------------------------------------------------------------------------------------------------------|--------------------------------------------|----------------------------------|
| <ul style="list-style-type: none"> <li>5. create promotional materials that provide clear details on what is required to participate in the program.</li> <li>6. meet with school staff to agree upon recruitment processes.</li> <li>7. provide schools with instructions on how to refer a parent to their program.</li> <li>8. provide schools with publicity materials for their program.</li> </ul>                                                                                                                                                                                                                                                                                                                                                                                                                                                                                                                                                                                                 |                                            |                                  |
| <p><b>Increasing the understanding of educational staff</b></p> <p><i>There should be...</i></p> <ul style="list-style-type: none"> <li>1. guidelines for school staff on how to engage parents in programs.</li> <li>2. guidelines for teachers on how to approach parents who may feel a sense of shame if invited to a program.</li> <li>3. guidelines on the language and terms to use when promoting programs to parents.</li> <li>4. professional development for teachers focused on how to engage parents.</li> <li>5. training for school staff regarding student mental health and wellbeing.</li> <li>6. training for teachers to see the relationship between parenting, the child's mental health, and their academic performance.</li> <li>7. training for principals to see the relationship between parenting, the child's mental health, and their academic performance.</li> <li>8. efforts to ensure the reception staff are aware of the programs the school is offering.</li> </ul> | Nil.                                       | Nil.                             |

| Endorsed (≥80% expert consensus)                                                 | To be re-rated (70-79.9% expert consensus) | Rejected (<70% expert consensus)                                                                                                          |
|----------------------------------------------------------------------------------|--------------------------------------------|-------------------------------------------------------------------------------------------------------------------------------------------|
| 9. school policies that emphasise the importance of family engagement.           |                                            |                                                                                                                                           |
| <b>Increasing teachers' involvement in parent education programs</b><br><br>Nil. | Nil.                                       | 1. Staff in educational settings should be trained to deliver programs.<br>2. Teachers should participate in school facilitated programs. |

## Round 2 Survey

| Endorsed (≥80% expert consensus)                                                                                                                                                                                                                                                                                                                                                                                                                                                                                                                                                                                                                                                | To be re-rated (>70<79% expert consensus)                                                                                                                                    | Rejected (<70% expert consensus)                                                                                                                                                                                                                                                                                                                                                                                                                       |
|---------------------------------------------------------------------------------------------------------------------------------------------------------------------------------------------------------------------------------------------------------------------------------------------------------------------------------------------------------------------------------------------------------------------------------------------------------------------------------------------------------------------------------------------------------------------------------------------------------------------------------------------------------------------------------|------------------------------------------------------------------------------------------------------------------------------------------------------------------------------|--------------------------------------------------------------------------------------------------------------------------------------------------------------------------------------------------------------------------------------------------------------------------------------------------------------------------------------------------------------------------------------------------------------------------------------------------------|
| <b>Parent education programs selection</b><br><br><i>Schools should...</i> <ol style="list-style-type: none"> <li>select programs with evidence on motivating behaviour change in parents (and not just based on appraisals of the program's 'likeability').</li> <li>select programs with a clear evidence base for improving student outcomes.</li> <li>adapt programs to suit the unique needs and resources of their school communities.</li> <li>offer both universal and targeted programs in order to meet the diverse needs of parents and children.</li> <li>involve the broader parent community, besides parent committees, in the selection of programs.</li> </ol> | <i>Schools should...</i> <ol style="list-style-type: none"> <li>select programs that could be run in multiple rounds each year to allow for 'refresher' sessions.</li> </ol> | <i>Schools should...</i> <ol style="list-style-type: none"> <li>receive funding support for efforts to increase parent engagement.</li> <li>receive funding as an incentive to achieve parent engagement targets.</li> <li>select programs that could be run in multiple rounds each year to help reduce the stigma of participating in these programs.</li> <li>select programs that include activities in which children can participate.</li> </ol> |

| Endorsed (≥80% expert consensus)                                                                                                                                                                                                                                                                                                                                                                                                                                                                                                                                                                                                                                                                                    | To be re-rated (>70<79% expert consensus)                                                                                                                                                                                                                                                                                               | Rejected (<70% expert consensus)                                                                                                                                                                                                                                                                                                                                                                                                      |
|---------------------------------------------------------------------------------------------------------------------------------------------------------------------------------------------------------------------------------------------------------------------------------------------------------------------------------------------------------------------------------------------------------------------------------------------------------------------------------------------------------------------------------------------------------------------------------------------------------------------------------------------------------------------------------------------------------------------|-----------------------------------------------------------------------------------------------------------------------------------------------------------------------------------------------------------------------------------------------------------------------------------------------------------------------------------------|---------------------------------------------------------------------------------------------------------------------------------------------------------------------------------------------------------------------------------------------------------------------------------------------------------------------------------------------------------------------------------------------------------------------------------------|
| <ol style="list-style-type: none"> <li>select programs that demonstrate cultural awareness.</li> <li>select programs with a universal whole school approach which simultaneously targets teachers, parents and students.</li> </ol>                                                                                                                                                                                                                                                                                                                                                                                                                                                                                 |                                                                                                                                                                                                                                                                                                                                         |                                                                                                                                                                                                                                                                                                                                                                                                                                       |
| <p><b>Program development</b></p> <p><i>Program developers should...</i></p> <ol style="list-style-type: none"> <li>develop an evidence base on effective strategies for family-school partnerships.</li> <li>develop an evidence base on what works for family engagement.</li> <li>design a program based on principles and values that reflect the role of parents in moulding the future of their children.</li> <li>engage parents in co-designing programs.</li> <li>seek input from family service providers when developing their programs.</li> <li>seek input from parents when developing their programs.</li> <li>design programs that focus on the needs of both the family and the school.</li> </ol> | <p><i>Program developers should...</i></p> <ol style="list-style-type: none"> <li>engage students where possible in co-designing programs.</li> <li>incorporate current school protocols (e.g. managing challenging behaviours, school values) and use existing strengths of the school, if a whole school approach is used.</li> </ol> | <p><i>Program developers should...</i></p> <ol style="list-style-type: none"> <li>develop an evidence base on effective strategies for engaging community groups of people with shared interests on child and family wellbeing.</li> <li>engage educators in co-designing programs.</li> <li>seek input from educators with joint expertise in the areas of health, mental health and wellbeing, disability and inclusion.</li> </ol> |
| <p><b>Increasing the accessibility of parent education programs</b></p> <p><i>Program developers should provide parents with choice on how the program is delivered, including...</i></p> <ol style="list-style-type: none"> <li>being delivered in community areas near public transport options.</li> </ol>                                                                                                                                                                                                                                                                                                                                                                                                       | <p><i>Program developers should provide parents with choice on how the program is delivered, including...</i></p>                                                                                                                                                                                                                       | <p><i>Program developers should provide parents with choice on how the program is delivered, including...</i></p> <ol style="list-style-type: none"> <li>being delivered at home if the program is face-to-face.</li> </ol>                                                                                                                                                                                                           |

| Endorsed (≥80% expert consensus)                                                                                                                                                                                                                                                                                                                                                                                                                                                                                                                                                                                                                                                                                                                                                                                                                                                                                              | To be re-rated (>70<79% expert consensus)                                                                                                                                                                                                                                                                                                               | Rejected (<70% expert consensus)                                                                                                                                                                                                                                                                                                                                                                                                                                                                                                                                                                                                                                                                                                                                                                                                                                                                                                                   |
|-------------------------------------------------------------------------------------------------------------------------------------------------------------------------------------------------------------------------------------------------------------------------------------------------------------------------------------------------------------------------------------------------------------------------------------------------------------------------------------------------------------------------------------------------------------------------------------------------------------------------------------------------------------------------------------------------------------------------------------------------------------------------------------------------------------------------------------------------------------------------------------------------------------------------------|---------------------------------------------------------------------------------------------------------------------------------------------------------------------------------------------------------------------------------------------------------------------------------------------------------------------------------------------------------|----------------------------------------------------------------------------------------------------------------------------------------------------------------------------------------------------------------------------------------------------------------------------------------------------------------------------------------------------------------------------------------------------------------------------------------------------------------------------------------------------------------------------------------------------------------------------------------------------------------------------------------------------------------------------------------------------------------------------------------------------------------------------------------------------------------------------------------------------------------------------------------------------------------------------------------------------|
| <p><b><i>The programs should provide practical support, including...</i></b></p> <ol style="list-style-type: none"> <li>1. translation and interpreting services.</li> </ol>                                                                                                                                                                                                                                                                                                                                                                                                                                                                                                                                                                                                                                                                                                                                                  | <ol style="list-style-type: none"> <li>1. being delivered in non-school venues if the program is face-to-face.</li> </ol> <p><b><i>The programs should provide practical support, including...</i></b></p> <ol style="list-style-type: none"> <li>1. being delivered at the early childhood centre or school if the program is face-to-face.</li> </ol> | <ol style="list-style-type: none"> <li>2. being delivered via a combination of face-to-face and online modalities.</li> </ol>                                                                                                                                                                                                                                                                                                                                                                                                                                                                                                                                                                                                                                                                                                                                                                                                                      |
| <p><b>Parent education program promotion</b></p> <p><b><i>Schools should...</i></b></p> <ol style="list-style-type: none"> <li>1. provide programs as a suite of services and supports which families can access and engage with as part of a whole school community hub approach.</li> <li>2. appoint skilled staff/professionals in the school to build relationships with families and service providers.</li> <li>3. appoint skilled staff/professionals in the school to negotiate the delivery of local services and supports which meet family needs.</li> </ol> <p><b><i>School staff should...</i></b></p> <ol style="list-style-type: none"> <li>1. promote programs that are sensitive to the needs of the family as a whole, rather than focusing only on the child's school attendance and behaviour.</li> <li>2. promote programs that are sensitive to both the needs of the family and the school.</li> </ol> | <p>Nil.</p>                                                                                                                                                                                                                                                                                                                                             | <p><b><i>Schools should...</i></b></p> <ol style="list-style-type: none"> <li>1. engage community/religious groups to support the programs and help to draw parents to the programs.</li> <li>2. engage parents who are willing to lead program promotion activities during social events and activities.</li> </ol> <p><b><i>School staff should...</i></b></p> <ol style="list-style-type: none"> <li>1. lead program promotion activities during social events and activities for families.</li> </ol> <p><b><i>Program developers should...</i></b></p> <ol style="list-style-type: none"> <li>1. highlight the relevance of the program in meeting the needs of the school.</li> </ol> <p><b><i>Service providers should...</i></b></p> <ol style="list-style-type: none"> <li>1. provide programs as a suite of services and supports which families can access and engage with as part of a whole school community hub approach.</li> </ol> |

| Endorsed (≥80% expert consensus)                                                                                                                                                                                                                                                                                                                                                                                                                                                                                                                                                                                                                                                                                                                                                                                                                                                                                                                                                                                                                                                                                                                                                                                                                                                                                                                                                                                                | To be re-rated (>70<79% expert consensus) | Rejected (<70% expert consensus)                                                                                                                                                                                 |
|---------------------------------------------------------------------------------------------------------------------------------------------------------------------------------------------------------------------------------------------------------------------------------------------------------------------------------------------------------------------------------------------------------------------------------------------------------------------------------------------------------------------------------------------------------------------------------------------------------------------------------------------------------------------------------------------------------------------------------------------------------------------------------------------------------------------------------------------------------------------------------------------------------------------------------------------------------------------------------------------------------------------------------------------------------------------------------------------------------------------------------------------------------------------------------------------------------------------------------------------------------------------------------------------------------------------------------------------------------------------------------------------------------------------------------|-------------------------------------------|------------------------------------------------------------------------------------------------------------------------------------------------------------------------------------------------------------------|
| <ul style="list-style-type: none"> <li>3. use a strength-based approach when discussing programs with parents.</li> <li>4. use language that is inclusive, blame-free and shame-free when discussing programs with parents.</li> <li>5. use language and a tone of voice that reflects empathy with parents' frustrations/challenges.</li> <li>6. advertise programs using inclusive and non-stigmatising language.</li> </ul> <p><b>Program developers should...</b></p> <ul style="list-style-type: none"> <li>1. create promotional materials in languages other than English.</li> <li>2. offer a suite of communication tools that can be easily adapted for use by an individual school or early childhood centre.</li> <li>3. advertise programs using inclusive and non-stigmatising language.</li> <li>4. ensure the buy-in of the school leadership and student wellbeing teams prior to promoting the program.</li> </ul> <p><b>Service providers should...</b></p> <ul style="list-style-type: none"> <li>1. offer a suite of communication tools that can be easily adapted for use by an individual school or early childhood centre.</li> <li>2. be aware of other programs available at the school.</li> <li>3. advertise programs using inclusive and non-stigmatising language.</li> <li>4. ensure the buy-in of the school leadership and student wellbeing teams prior to promoting the program.</li> </ul> |                                           | <ul style="list-style-type: none"> <li>2. highlight the relevance of the program in meeting the needs of the school.</li> <li>3. have a good understanding of the mental health issues at the school.</li> </ul> |



| Endorsed (≥80% expert consensus)                                                                                                                                                                                                                                                                                                                                                                                                                                                                                                                                                                                                                                                                                                                                                                                                                                                                                                                                                                | To be re-rated (>70<79% expert consensus)                                                                                                                                                      | Rejected (<70% expert consensus)                                                                                                                                                                                                                                                                                                           |
|-------------------------------------------------------------------------------------------------------------------------------------------------------------------------------------------------------------------------------------------------------------------------------------------------------------------------------------------------------------------------------------------------------------------------------------------------------------------------------------------------------------------------------------------------------------------------------------------------------------------------------------------------------------------------------------------------------------------------------------------------------------------------------------------------------------------------------------------------------------------------------------------------------------------------------------------------------------------------------------------------|------------------------------------------------------------------------------------------------------------------------------------------------------------------------------------------------|--------------------------------------------------------------------------------------------------------------------------------------------------------------------------------------------------------------------------------------------------------------------------------------------------------------------------------------------|
| <p><b>Increasing the understanding of educational staff</b></p> <p><i>There should be...</i></p> <ol style="list-style-type: none"> <li>1. professional development for educational staff on the value of parent-teacher/family-school partnership in supporting a child.</li> <li>2. professional development for educational staff on the value of parent-education programs.</li> <li>3. opportunities for educational staff to be partners in program implementation and delivery, so they learn through doing.</li> <li>4. training for school staff to effect positive change in attitudes towards parent engagement.</li> <li>5. training for front-line administrative/reception staff on how to engage parents.</li> <li>6. vision and mission statements in schools/early learning centres that emphasise the importance of students' mental and physical wellbeing.</li> <li>7. school leadership to ensure the success of programs implemented for the school community.</li> </ol> | <p>Nil.</p>                                                                                                                                                                                    | <p><i>There should be...</i></p> <ol style="list-style-type: none"> <li>1. professional development for all levels of educational staff on state policies and terms of reference on family-school partnerships.</li> </ol>                                                                                                                 |
| <p><b>Program delivery</b></p> <ol style="list-style-type: none"> <li>1. School staff should be offered some training or support if necessary, by experts in the relevant subject area.</li> <li>2. Schools/service providers should incorporate social elements when running programs for families (e.g. parents are able to share food and meet with each other).</li> </ol>                                                                                                                                                                                                                                                                                                                                                                                                                                                                                                                                                                                                                  | <ol style="list-style-type: none"> <li>1. Programs should be co-facilitated by school staff and external staff so that relationships built between families and school staff can be</li> </ol> | <ol style="list-style-type: none"> <li>1. Teachers should be involved in program delivery as part of a school-wide family engagement and student wellbeing approach so that it is effective and sustainable.</li> <li>2. Funding should be available to schools to support the appointment of teachers to deliver the programs.</li> </ol> |

| Endorsed (≥80% expert consensus)                                                  | To be re-rated (>70<79% expert consensus)                                   | Rejected (<70% expert consensus)                                                                                                                                                                                                                                                                                                                                                                                                                                                                                                                                                                                                                                                                                                                                                                                                                                                                                                                                                                                                                                                                                                                                                                                                                                                                 |
|-----------------------------------------------------------------------------------|-----------------------------------------------------------------------------|--------------------------------------------------------------------------------------------------------------------------------------------------------------------------------------------------------------------------------------------------------------------------------------------------------------------------------------------------------------------------------------------------------------------------------------------------------------------------------------------------------------------------------------------------------------------------------------------------------------------------------------------------------------------------------------------------------------------------------------------------------------------------------------------------------------------------------------------------------------------------------------------------------------------------------------------------------------------------------------------------------------------------------------------------------------------------------------------------------------------------------------------------------------------------------------------------------------------------------------------------------------------------------------------------|
|                                                                                   | sustained throughout their child's schooling after the programs have ended. | <ol style="list-style-type: none"> <li>3. Programs should be facilitated by school staff if their involvement would generate greater trust from families.</li> <li>4. Programs should be co-facilitated by school staff and external staff so that relationships built between families and school staff can be sustained throughout their child's schooling after the programs have ended.</li> <li>5. Programs should be facilitated by external staff or service providers as they can offer a new perspective.</li> <li>6. Teachers need to build relationships and trust with parents before they undertake a program together.</li> <li>7. There should be a teacher-parent relationship that focusses on a partnership to support children's learning and wellbeing.</li> <li>8. Programs should be facilitated by teachers if the programs are targeted at students.</li> <li>9. Programs should be facilitated by external experts if the programs are targeted at parents.</li> <li>10. Program developers/service providers should provide supervision for teachers seeking to further their skills in delivering the programs.</li> <li>11. Program developers/service providers should provide drop-in or scheduled appointments for parents seeking further discussion.</li> </ol> |
| <b>Increasing parent and community engagement</b><br><br><i>Schools should...</i> | Nil.                                                                        | Nil.                                                                                                                                                                                                                                                                                                                                                                                                                                                                                                                                                                                                                                                                                                                                                                                                                                                                                                                                                                                                                                                                                                                                                                                                                                                                                             |

| Endorsed (≥80% expert consensus)                                                                                                                                                                                                                                                                                                                                                                                                                                                                                                                                                                                                                                                                                                                                                                                                                                                                                                                                                                                                                                                                                                                                                                                                                                                                                                                             | To be re-rated (>70<79% expert consensus) | Rejected (<70% expert consensus) |
|--------------------------------------------------------------------------------------------------------------------------------------------------------------------------------------------------------------------------------------------------------------------------------------------------------------------------------------------------------------------------------------------------------------------------------------------------------------------------------------------------------------------------------------------------------------------------------------------------------------------------------------------------------------------------------------------------------------------------------------------------------------------------------------------------------------------------------------------------------------------------------------------------------------------------------------------------------------------------------------------------------------------------------------------------------------------------------------------------------------------------------------------------------------------------------------------------------------------------------------------------------------------------------------------------------------------------------------------------------------|-------------------------------------------|----------------------------------|
| <ol style="list-style-type: none"> <li>1. recruit suitably qualified staff to engage with community groups with shared interests in child and family wellbeing.</li> <li>2. recruit suitably qualified staff to build parents' capacity to engage as partners with the school to improve student mental health and wellbeing outcomes.</li> <li>3. recruit suitably qualified staff to support teacher professional development in engagement with families as partners with the school to improve student mental health and wellbeing outcomes.</li> <li>4. use evidence-based school improvement strategies to improve student mental health and wellbeing outcomes.</li> <li>5. use evidence-based strategies to improve partnerships with community groups with shared interests in child and family wellbeing.</li> <li>6. use evidence-based school improvement strategies to improve the tripartite partnership between school, family and community groups with shared interests in child and family wellbeing.</li> </ol> <p><b><i>School leadership should...</i></b></p> <ol style="list-style-type: none"> <li>1. drive schools' efforts at building partnerships with families.</li> <li>2. develop a school culture that enables parent/family engagement.</li> <li>3. establish goals and strategies for parent/family engagement.</li> </ol> |                                           |                                  |

### Round 3 Survey

| Endorsed (≥80% expert consensus)                                                                                                                                                                                                                                                                          | Rejected (<70% expert consensus)                                                                                                                                                                                                                                                                                                  |
|-----------------------------------------------------------------------------------------------------------------------------------------------------------------------------------------------------------------------------------------------------------------------------------------------------------|-----------------------------------------------------------------------------------------------------------------------------------------------------------------------------------------------------------------------------------------------------------------------------------------------------------------------------------|
| <b>Parent education programs selection</b><br><br><i>Schools should...</i> <ol style="list-style-type: none"> <li>select programs that could be run in multiple rounds each year to allow for 'refresher' sessions.</li> </ol>                                                                            | <p>Nil.</p>                                                                                                                                                                                                                                                                                                                       |
| <b>Program development</b><br><br><p>Nil.</p>                                                                                                                                                                                                                                                             | <i>Program developers should...</i> <ol style="list-style-type: none"> <li>engage students where possible in co-designing programs.</li> <li>incorporate current school protocols (e.g., managing challenging behaviours, school values) and use existing strengths of the school, if a whole school approach is used.</li> </ol> |
| <b>Increasing the accessibility of parent-education programs</b><br><br><i>Program developers should provide parents with choice on how the program is delivered, including...</i> <ol style="list-style-type: none"> <li>being delivered in non-school venues if the program is face-to-face.</li> </ol> | <i>The programs should provide practical support, including...</i> <ol style="list-style-type: none"> <li>being delivered at the early childhood centre or school if the program is face-to-face.</li> </ol>                                                                                                                      |
| <b>Program delivery</b><br><br><p>Nil.</p>                                                                                                                                                                                                                                                                | <ol style="list-style-type: none"> <li>Programs should be co-facilitated by school staff and external staff so that relationships built between families and school staff can be sustained throughout their child's schooling after the programs have ended.</li> </ol>                                                           |

Note. In the surveys, each statement starts with the stem, "In order to increase parent engagement in parent-education programs, ...".
